# Supplementary material for: Wnt target enhancer regulation by a CDX/TCF transcription factor collective and a novel DNA motif
Source: PubMed Central journal article supplement — Nucleic Acids Res. 2021 Aug 6;49(15):8625–41. doi: 10.1093/nar/gkab657 (PMC8421206; doi:10.1093/nar/gkab657), 2021-08-06
Supplement: gkab657_supplemental_file.pdf [file gkab657_supplemental_file.pdf]

CREAX (CDX Regulated Enhancer of Axin2) enhancer sequence:  
Chr17:65515956–65516375

GGAACCCGCTGAATGGCTGGGAAACTGTTTTTAATAAACAAGA**GTTCAAACG**CTGAGTCTCCATAGCCAACAGTCACG  
CCTTAAACTCTAAACTTTACATGAAAACCTCTCCCAGTC**CCTTTGAAC**TCTCCTTCCCTCTCCGACGGAGCATTCCAGT  
GTTTATGCATTTTTTCGAGATTGCTGGCAGGATTGCGAGGC**GCTTTGAAT**ACTTTCCCTCTCTTTAGCAATCTCCTGCC  
TTCAGAACCCATTAATGCCCCACTCAGCAACATCAAGGTAAT**GCTTTGAAG**TCCCTTCTGGCTACAGGCCTCTCACAC  
TCTTTGGTTACTGTGCAATCAAATAATTAATGGATTCTCAGGGAAAAAAAAAATCATTCTTTTCCCTTGTAATTA  
TACTCCAGGTTGGACAGGAGCGCTGTGTTG

c-Myc-335 enhancer sequence:  
Chr8:127400835–127401814

CGCTCCATAGAGCCTGCAGAGGGCACTAGACTGCGAATTAGAAAACCTGATTTCCCTTCCAGCTCCACCTCTGACCAA  
TTGCCTGACCCTGGTCAAATTGCTTAACCTCTTCCTATCTCAGCTCCCTATCCATAAAACAGAGGGACGAATAAATC  
TCCTCCTACCACTAAGAGGTGTAGCCAGAGTTAATACCCTCATCGT**CCTTTGAGC**TCAGCAGATGAAAGGCACTGAG  
AAA**GTACAAAGA**ATTTTTATGTGCTATTGACTTTATTTTATTTTATGTGGGGAGGGAGCCGGCCCCAGCTGGAAAGC  
TGCTTTCTCTG**AATCAAAGG**GCAGGAACCCAGCAAGTTTCTCAGGATTGGGGCCTTAGACTGGGCTGTGTATACAGAC  
AGTGCCAGCCAACCCACAGTTCAGTTTCCCTTTAACCTGGTGCTCCAGGCAATAACTGTGCAACTCTGCAATTTAACA  
ATGTGTTCTTTGTCCCACAACCTGTTTCTCGTTTCTCAACTGCCCAGGTAATATGTTTGGGCCTGTAGGAAGAGTCAAAT  
AGTTAATAAGGGAAGGGTTTGGCATGCCCTACGTAAGTCTACCAGCAAGTCCCAACAAGAAGGCATTCTGTGTCTCC  
TGATTCCCTGACCTACCCCAAATGTACAAATGTACAAGGAATGAGCCCACCTTCCAGCAGGCTGTAATACCAGTTT  
GGCCTATATCAATGCATTGGTGAGCTGTGTTTTGTTTATGGTTTTATGCCATCTATTTTCCCATGGATATTATGTTTT  
CTAAAGAGCCCTTAAGTTTACGTCAGCTTTTAAAGCTACCAGCAGCACCATTTAGTTCATATTAAGCCCTTAATATG  
GTATGAATAGGAGAGCTATTAGACTAAAGAGCCATAATCATCCCTGAGGAAAACATCCATCACCAACATTTATGTGGT  
CCCTGAACTTCTAAAAGGTGTCATCTCTCTGGGGTGTATCTGGT

Legend: **TCF sites** **CDX sites** CAG sites

**Supplementary Figure 1. Annotated sequences of human CREAX and c-Myc-335 enhancers.**  
The positions shown are with respect to the GRCh38.p13 primary assembly of the Homo sapiens genome. TCF sites are emboldened and highlighted in red, CDX sites are highlighted in green, and CAG sites are underlined and highlighted in teal.

| Position | WT sequence | Mutated sequence |
|----------|-------------|------------------|
| 2-11     | GAACCCGCTG  | TCCAAATAGT       |
| 12-21    | AATGGCTGGG  | CCGTTAGTTT       |
| 22-31    | AAACTGTTTT  | CCCAGTGGGG       |
| 32-41    | TAATAAACAA  | GCCGCCACC        |
| 42-52    | GAGTTCAAACG | GAGTGAACAG       |
| 57-66    | GTCTCCATAG  | TGAGAACGCT       |
| 67-76    | CCAACAGTCA  | AACCACTGAC       |
| 77-86    | CGCCTTAAAC  | ATAAGGCCCA       |
| 87-96    | TCTAAACTTT  | GAGCCCAGGG       |
| 97-106   | ACATGAAAAC  | CACGTCCCCA       |
| 107-116  | TCTCCAGTC   | GAGAACTGA        |
| 117-127  | CCTTTGAACTC | CCTGTTCACTC      |
| 131-139  | TTCCCTCTC   | GGAAAGAGA        |
| 140-149  | CGACGGAGCA  | ATCATTCTAC       |
| 150-159  | TTCCAGTGTT  | GGAAGTGTGG       |
| 160-169  | TATGCATTTT  | GCGTACGGGG       |
| 170-179  | TCGAGATTGC  | GATCTCGGTA       |
| 180-189  | TGGCAGGATT  | GTTACTTCGG       |
| 190-196  | GCGAGGC     | TATCTTA          |
| 197-207  | GCTTTGAATAC | GCTGTTCATAC      |
| 209-217  | TTCCCTCTC   | GGAAAGAGA        |

| Position | WT sequence | Mutated sequence |
|----------|-------------|------------------|
| 218-227  | TTTAGCAATC  | GGGCTACCGA       |
| 228-237  | TCCTGCCTTC  | GAAGTAAGGA       |
| 238-247  | AGAACCATT   | CTCCAAACGG       |
| 248-257  | AATGCCCCAC  | CCGTAAAACA       |
| 258-267  | TCAGCAACAT  | GACTACCACG       |
| 268-276  | CAAGGTAAT   | ACCTTGCCG        |
| 277-287  | GCTTTGAAGTC | GCTGTTCACTC      |
| 288-293  | CCTTCT      | AAGGAG           |
| 294-303  | GGCTACAGGC  | TTAGCACTTA       |
| 304-312  | CTCTCACAC   | AGAGACACA        |
| 313-323  | TCTTTGGTTAC | TCTGTTGTTAC      |
| 324-329  | TGTGCA      | GTGTAC           |
| 330-337  | ATCAAATA    | AGAACATA         |
| 338-347  | ATTAAATGGA  | CGGCCCGTTC       |
| 348-357  | TTCTCAGGGA  | GGAGACTTTC       |
| 358-367  | AAAAAAAAAT  | CACACACCG        |
| 368-377  | CATTCTTTTC  | ACGGAGGGGA       |
| 378-387  | CTTGTAATT   | AGGTTGCCGG       |
| 388-397  | AAATACTCCA  | CCCGCAGAAC       |
| 398-407  | GGTTGGACAG  | TTGGTTCACT       |
| 408-417  | GAGCGCTGTG  | TCTATAGTGT       |

**Supplementary table 1. Mutations made in CREAX screening mutagenesis constructs.**

| Reporter             | Position | WT sequence      | Mutated sequence |
|----------------------|----------|------------------|------------------|
| c-Myc-335 TCF mutant | 203–211  | CCTTTGAGC        | CCTgTtcGC        |
|                      | 218–226  | GATGAAAGG        | GAgtAcAGG        |
|                      | 238–246  | GTACAAAGA        | GTACAcAtc        |
|                      | 324–332  | AATCAAAGG        | AAgaAcAGG        |
| c-Myc-335 CAG mutant | 29–34    | GACTGG           | tAaTtG           |
|                      | 212–217  | TCAGCA           | TaAtaA           |
|                      | 227–232  | CACTGA           | tAaTtA           |
|                      | 370–380  | GACTGGGCTGT      | tAaTtGtaTtT      |
|                      | 385–400  | ACAGACAGTGCCAGCC | AaAtcaAtTtCaAtaC |
|                      | 454–460  | CTCTGCA          | CgaTtCA          |
|                      | 375–380  | GGCTGT           | GtagtT           |
| c-Myc-335 CDX mutant | 130–136  | CCATAAA          | CCcgAAA          |
|                      | 250–258  | TTTATGTGC        | TTTcgGTGC        |
|                      | 276–284  | TTTATGTGG        | TTTcgGTGG        |
|                      | 737–744  | TTTATGGT         | TTTcgGGT         |
|                      | 745–753  | TTTATGCCA        | TTTcgGCCA        |
|                      | 925–933  | CATTTATGT        | CATTTcgGT        |
| CREAX TCF mutant     | 117–127  | CCTTTGAACTC      | CCTgTtcACTC      |
|                      | 277–287  | GCTTTGAAGTC      | GCTgTtcAGTC      |
| CREAX CAG mutant     | 70–75    | ACAGTC           | AactTC           |
|                      | 111–116  | CCAGTC           | CactTC           |
|                      | 152–157  | CCAGTG           | CACTTG           |
|                      | 236–241  | TCAGAA           | TACGAA           |
|                      | 258–263  | TCAGCA           | TACTCA           |
| CREAX CDX mutant     | 158–164  | TTTATGC          | TTTcgGC          |
|                      | 246–252  | TTAATGC          | TTAcgGC          |

**Supplementary table 2. Directed mutations in TCF, CDX, and CAG sites of CREAX and c-Myc-335 reporters.**

| Gene   | shRNA target sequence |
|--------|-----------------------|
| CDX1   | GTGAAGATCTGGTTCCAAA   |
| CDX2   | GAAGGAGTTTCACTACAGT   |
| LEF1   | GGTACATAATGATGCCAAA   |
| TCF7   | CCAAGAAGCCAACCATCAA   |
| TCF7L2 | AAAGTGCGTTCGCTACATA   |

**Supplementary table 3. Targeting sequences of the shRNA constructs used in this study.**

| Reporter | Primer 1                                                                                                                                | Primer 2                                                                                                                                |
|----------|-----------------------------------------------------------------------------------------------------------------------------------------|-----------------------------------------------------------------------------------------------------------------------------------------|
| TCF/CAG  | GATCTCCAACAGTCACGGTACCTTTGATCTTGTAAGG<br>GCGTAGTACCAACAGTCACGGTACCTTTGATCTTGTA<br>AGGGCGTAGTACCAACAGTCACGGTACCTTTGATCTT<br>GTAAGGGCGTAC | TCGAGTACGCCCTTACAAGATCAAAGGTACCGTGACT<br>GTTGGTACTACGCCCTTACAAGATCAAAGGTACCGTG<br>ACTGTTGGTACTACGCCCTTACAAGATCAAAGGTACC<br>GTGACTGTTGGA |
| TCF/CDX  | GATCTAACCTCTCACAAGTACCTTTGATCTTGTAAGG<br>ATGCGTAAACCTCTCACAAGTACCTTTGATCTTGTA<br>TTTATGCGTAAACCTCTCACAAGTACCTTTGATCTTG<br>AGTTTATGCC    | TCGAGGCATAAACTACAAGATCAAAGGTACTTGTGAG<br>AGGTTTACGCATAAACTACAAGATCAAAGGTACTTGT<br>GAGAGGTTTACGCATAAACTACAAGATCAAAGGTACT<br>TGTGAGAGGTTA |
| TCF      | GATCTAACCTCTCACAAGTACCTTTGATCTTGTAAGG<br>GCGTAGTAAACCTCTCACAAGTACCTTTGATCTTGTA<br>AGGGCGTAGTAAACCTCTCACAAGTACCTTTGATCTT<br>GTAAGGGCGTAC | TCGAGTACGCCCTTACAAGATCAAAGGTACTTGTGAG<br>AGGTTTACTACGCCCTTACAAGATCAAAGGTACTTGT<br>GAGAGGTTTACTACGCCCTTACAAGATCAAAGGTACT<br>TGTGAGAGGTTA |
| CDX/CAG  | GATCTCCAACAGTCACGGTACCTGTTCTTGTAGTT<br>TATGCGTACCAACAGTCACGGTACCTGTTCTTGTGTA<br>GTTTATGCGTACCAACAGTCACGGTACCTGTTCTT<br>GTAGTTTATGCC     | TCGAGGCATAAACTACAAGAGAACAGGTACCGTGACT<br>GTTGGTACGCATAAACTACAAGAGAACAGGTACCGTG<br>ACTGTTGGTACGCATAAACTACAAGAGAACAGGTACC<br>GTGACTGTTGGA |

**Supplementary table 4. Primers used to generate synthetic reporters.**

| Target site          | Oligo sequence            |
|----------------------|---------------------------|
| ACTGGAATGCTCCGTCGGAG | CACCGACTGGAATGCTCCGTCGGAG |
|                      | AAACCTCCGACGGAGCATTCCAGTC |
| TAAGGCGTGACTGTTGGCTA | CACCGTAAGGCGTGACTGTTGGCTA |
|                      | AAACTAGCCAACAGTCACGCCTTAC |
| AGATTGCTGGCAGGATTGCG | CACCGAGATTGCTGGCAGGATTGCG |
|                      | AAACCGCAATCCTGCCAGCAATCTC |
| TTAAATACTCCAGGTTGGAC | CACCGTTAAATACTCCAGGTTGGAC |
|                      | AAACGTCCAACCTGGAGTATTTAAC |

**Supplementary table 5. gRNA target sites used to target CREAX for CRISPRi experiments along with the oligonucleotide sequences used to clone them into sgOpti.**

| UniProt ID | Species                  | Protein  | Position |     | Sequence                         |
|------------|--------------------------|----------|----------|-----|----------------------------------|
| Q9UJU2     | Human                    | LEF1     | 359      | 387 | HMQLYPGWSARDNYGKKKKRKRREKQLQESA  |
| P36402     | Human                    | TCF7     | 329      | 357 | HMQLYPGWSARDNYGKKKKRRSREKHQEST   |
| Q9HCS4     | Human                    | TCF711   | 406      | 434 | HSQLYPTWSARDNYGKKKKRKRREKQLSQT   |
| Q9NQB0     | Human                    | TCF712   | 410      | 438 | HMQLYPGWSARDNYGKKKKRKRREKQPGET   |
| P27782     | Mouse                    | LEF1     | 357      | 385 | HMQLYPGWSARDNYGKKKKRKRREKQLQEST  |
| Q00417     | Mouse                    | TCF7     | 364      | 392 | HMQLYPGWSARDNYGKKKKRRSREKHQEST   |
| Q9Z1J1     | Mouse                    | TCF711   | 402      | 430 | HAQLYPTWSARDNYGKKKKRKRREKQLSQT   |
| Q924A0     | Mouse                    | TCF712   | 388      | 416 | HMQLYPGWSARDNYGKKKKRKRREKQPGET   |
| Q9QXN1     | Rat                      | LEF1     | 357      | 385 | HMQLYPGWSARDNYGKKKKRKRREKQLQEST  |
| D3ZLD0     | Rat                      | TCF7     | 364      | 392 | HMQLYPGWSARDNYGKKKKRRSREKHQEST   |
| F1M1R9     | Rat                      | TCF711   | 405      | 433 | HAQLYPTWSARDNYGKKKKRKRREKQLSQT   |
| D4A8X6     | Rat                      | TCF712   | 319      | 347 | HMQLYPGWSARDNYGKKKKRKRREKQPGET   |
| O93345     | Chick                    | LEF1     | 329      | 357 | HMQLYPGWSARDNYGKKKKRKRREKQLQESA  |
| Q8JHX2     | Chick                    | TCF7     | 313      | 341 | HMQLYPGWSARDNYGKKKKRRTREKQQDSN   |
| A0A3Q2TXB3 | Chick                    | TCF711   | 409      | 437 | HSQLYPTWSARDNYVSVTHAPQRCGGAEC    |
| E1BYU0     | Chick                    | TCF712   | 387      | 415 | HMQLYPGWSARDNYGKKKKRKRREKQPGET   |
| Q9W7C0     | Zebrafish                | LEF1     | 325      | 353 | HMQLYPGWSARDNYGKKKKRKRREKIQEPA   |
| Q5PU93     | Zebrafish                | TCF7     | 297      | 325 | HVQLYPSWSARDNYVSALGKKRRRKRDKQ    |
| Q9YHE8     | Zebrafish                | TCF711a  | 389      | 417 | HSQLYPGWSARDNYGKRKKRKRREKCKSDSP  |
| Q800Q5     | Zebrafish                | TCF711b  | 386      | 414 | HSQLYPGWSARDNYGKRKKRKRREKNDKTDST |
| Q71G52     | Zebrafish                | TCF712   | 393      | 421 | HMQLYPGWSARDNYGKKKKRKRREKQAGEG   |
| P91943     | Drosophila               | Pangolin | 333      | 361 | HMELYPGWSARDNYGYVSKKKRKRKDRST    |
| E2IJ94     | Amphimedon queenslandica | TCF      | 290      | 318 | HMQMPGWSARDNYAAHKKRRKRKRSKQAE    |
| T2M4F7     | Hydra                    | TCF712   | 250      | 278 | HMQLYPGWSARDNYAQIGRKKKRPRDKNE    |

**Supplementary table 6. Conservation of residues mediating TCF-CDX interactions.**

This expanded version of the alignment in Fig. 3B shows the alignment of TCF/LEF family members from several species. The sequence shown consists of the C-terminal end of the HMG domain along with the basic tail. Highlighted in yellow are R350 and K352 in human TCF7 and corresponding residues that are identical in other TCF/LEF family members.

Defa5 (defensin alpha 5) promoter sequence:  
Chr8:7057354–7056738

GATGCATTTCAGATCACACCAACTCCTTGAACATAAATCCGAATT **TTTATTT** TAATCTGATAAACTTGGCCTACTATTTT  
ACTGAACTCATTTCCTTATAGCCTGATAAGGTCATTGACCTCTCCA TACTGGCA CCAGCG GGAGACTACTCACCTCG  
AGATCTCAAAGCCTCCTACATGAGGTTAGTAATATCCCTGAATCCTGCAAT **GAATTAA** CTCTCTACTC CACTGG GTC  
CCAGGTCTGCCCCAGAGAGTCATCCAGAGAGTACCAGGGACCATCTTCAGAAAACAAGAGGCATTTGATCCCCAAC  
TTCTTGAATGAAAG CGCTGT TGTTTTTCTTTTTTGAATATATAAAAGTAAATACTCAAGCAGATGGGAAACAGAACAG  
GATAGTAATACCCTTATCATCATTAAACACCTTGGATCAAGAAGAG **GCATTAA** GCATACAGACTCACG **CTTTGATG** AAA  
GCTGGGAGAAAGAGGAG **CATCAAAGG** GATCTTGA **GAACAAAGG** CAGTCCCTCCCCTCCAATCACATGCCACCTCCT  
CTCACTGCAGCTTCTGTCTCAGGTCTTCTC CCAGCA GAGCTATAAATCCA GGCTGA CTCTCACTCCCCAC

Defa6 (defensin alpha 6) promoter sequence:  
Chr8:6926050–6926680

TCACATGGGTTTCTTG **AAATAAA** TCTTTTGGCTTTAGTTTTACTAACTCTTTACCTAGTATCCCCTGAGTTCTTTTC  
CCTTATA GGCTGA TAAGGTCATTATCTTCTCCA CACTGT GCCCCACAAGAGCCTATTACCCCATAAATCTCAAAGCCT  
CCTTCATGAGGGCAGAAATGCCCCCTGAATCCTGCAAT **GAATTAA** CTCTCTACTCTAGCGGGATCCAGCTCTGGCCTC  
AAGGTCTAGACCTCCAGAGAGTGG CCAGCC CCACCTTCAGAAAATAAGAGGCATTTGATTCTGAAATTATTCATTGA  
AAG CACTGT TCTTTTCTTTTTTGAATATTAACAAGTAAATATT CCAGCA GATGGAAAACAGGACAATGTAA CACTGT T  
CTTATCATCACTATCAGCTGGGACCAGAACAGACACT **CAATAAACAGCC** TCACA **CTACAATGA** AGCTTGGA **GAACAAA**  
**GGAG** **CATCAAAGG** GACATGGAGGGCAAGGGTAGCTCTTCTGCTCCCCAATCACATGCACTCCCCGTCTCACC GCAACA  
TCTGTCCCTGAGCCTTCTC CCAGCA GACCTATAAATCCA GGCTGG CTCTCACTCCCCACACATCTGCTCCTGCTCTC  
TCTCCTC

Legend: **TCF sites** **CDX sites** CAG sites

**Supplementary Figure 2. Computationally predicted TCF, CDX, and CAG sites in defensin alpha 5/6 promoters.**

The positions shown are with respect to the GRCh38.p13 primary assembly of the Homo sapiens genome. Predicted TCF sites are emboldened and highlighted in red, CDX sites are highlighted in green, and CAG sites are underlined and highlighted in teal.
